# Supplementary material for: Metal free highly efficient C–N bond formation through 1,6-addition: synthesis and photophysical studies of diaryl methyl amino acid esters (DMAAEs)
Source: Royal Society of Chemistry journal article supplement (doi:10.1039/d0nj01587c), 2020-01-01
Supplement: d0nj01587c1.pdf [file d0nj01587c1.pdf]

**Metal free highly efficient C-N bond formation through 1,6-addition:  
Synthesis and photophysical studies of diaryl methyl amino acid esters  
(DMAAEs)**

Deblina Roy,<sup>†,‡</sup> Abhineet Verma,<sup>§</sup> Arpita Banerjee,<sup>†,‡</sup> Satyen Saha<sup>§,\*</sup> and Gautam Panda<sup>†,‡,\*</sup>

<sup>†</sup>Medicinal & Process Chemistry Division, CSIR-Central Drug Research Institute, BS-10/1, Sector 10, Jankipuram extension, Sitapur Road, P.O. Box 173, Lucknow 226031, India

<sup>§</sup> Department of Chemistry, Institute of Science, Banaras Hindu University, Varanasi 221005, India

<sup>‡</sup>Academy of Scientific and Innovative Research, New Delhi 110001, India

**Supporting information**

## Index of contents

| No   | Contents                                    | Page No   |
|------|---------------------------------------------|-----------|
| I    | General Information                         | SI- 3     |
| II   | Experimental procedure                      | SI- 3     |
| III  | Spectroscopic data of synthesized compounds | SI- 4-20  |
| IV   | Gram Scale Experiment                       | SI- 21    |
| V    | Some more examples                          | SI-22-23  |
| VI   | Synthetic Application                       | SI- 23    |
| VII  | Photo-physical studies                      | SI- 23-24 |
| VIII | References                                  | SI- 24    |

## I. General Information

All reactions were performed in flame-dried glassware with a magnetic stirring bar and sealed with a rubber septum. The solvents were distilled by standard methods. Reagents were obtained from commercial suppliers and used without further purification unless otherwise noted. Silica gel column chromatography was carried out using silica gel 60- 120 Mesh basified by triethylamine. Analytical thin layer chromatography (TLC) was done using silica gel (silica gel GF254). TLC plates were analyzed by an exposure to ultraviolet light and/or by staining with dragendorff solution and/or by charring with ninhydrin solution. The starting *para*-quinone methides were prepared through literature known procedures.<sup>1,2</sup> Nuclear magnetic resonance (NMR) spectra were recorded using Bruker Avance 400 Spectrometer. <sup>1</sup>H and <sup>13</sup>C chemical shifts are reported in ppm downfield of tetramethylsilane and referenced to residual solvent peak [CHCl<sub>3</sub>; δ<sub>H</sub> = 7.26 and δ<sub>C</sub> = 77.00]. Extra numbers of <sup>13</sup>C NMR peaks are for diastereomeric mixtures. In <sup>13</sup>C NMR spectra, they are reported as diastereomers and were not separated to report as single diastereomer. Multiplicities were given as: s (singlet); brs (broad singlet), d (doublet); t (triplet); q (quartet); dd (doublets of doublet); m (multiplets). High resolution mass spectra were taken with a 3000 mass spectrometer, using Waters Agilent 6520-Q-ToFMS/MS system and JEOL-AccuTOF JMST100LC. FT-IR spectra were obtained on Perkin Elmer Spectrum Two FTIR Spectrometer. Melting points are uncorrected and were determined in capillary tubes on SMP 10 melting point apparatus. Electronic spectra were recorded on a CARY 100 BIO UV-Vis spectrophotometer. Fluorescence spectra were recorded on a Horiba spectrofluorometer (Fluorolog) and quantum yield was calculated using the integrated sphere. Raman spectra were recorded on a Horiba LabRAM HR Evolution Raman microspectrometer. 633 nm laser source was used for sample excitation.

## II. Experimental procedure

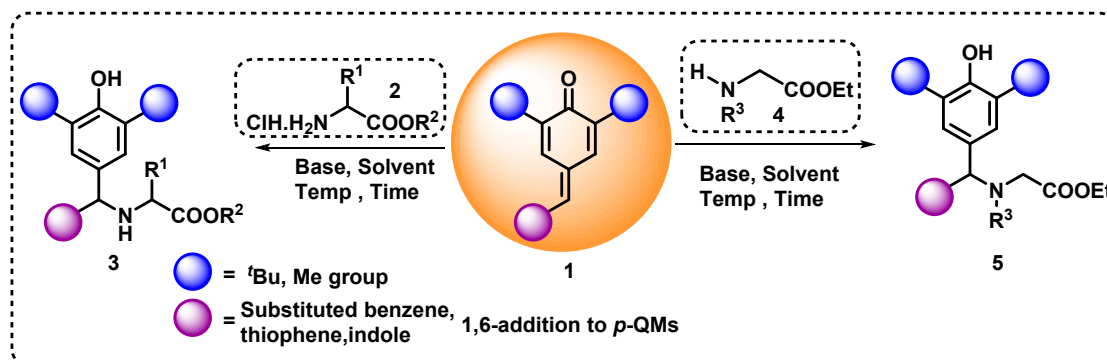

To a solution of 0.1 milimol of **1** in Chloroform (2ml) in a 10 ml round bottom flask, 0.2 milimol of **2** (amino acid ester hydrochlorides) or **4** was added. Then the reaction mixture was

then cooled to 0 ° C and K<sub>2</sub>CO<sub>3</sub>(6equiv) was added and the reaction mixture was stirred for 12h at RT and monitored by TLC until the starting material could not be detected. The reaction mixture was quenched with water and extracted with DCM (5 mL × 3). The organic layer was dried over Na<sub>2</sub>SO<sub>4</sub> and evaporated in vacuum. The residue was purified by silica gel column chromatography to afford the desired product **3** or **5**.

### III. Spectroscopic data of synthesized compounds

#### methyl ((3,5-di-tert-butyl-4-hydroxyphenyl)(4-fluorophenyl)methyl)-L-leucinate (3a):

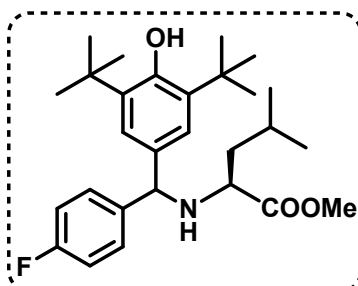

Light Yellow oil, isolated yield- 40mg (90%) ; R<sub>f</sub>(10% EtOAC/Hexane) - 0.5; IR(in CH<sub>2</sub>Cl<sub>2</sub>):  $\nu_{max}$ ; 3636, 3432, 2950, 1731, 1430, 1312, 1200, 1150, 1070, 814, 760; <sup>1</sup>H NMR(400MHz,CDCl<sub>3</sub>):  $\delta$  7.42-7.39 (1H,m), 7.36-7.33 (1H,m), 7.15 (1H,s), 7.10 (1H,s), 7.01-6.93 ( 2H,m), 5.10-5.09 (1H,m), 4.65 (1H,s), 3.74-3.71 (3H,m), 3.18-3.13 (1H,m), 1.96-1.88 (2H,m), 1.48-1.44 (1H,m), 1.41-1.40 (18H, m), 0.91-0.89 (3H,m), 0.81-0.77 (3H,m); <sup>13</sup>C NMR(100 MHz,CDCl<sub>3</sub>):  $\delta$  176.85, 176.68, 162.91, 162.76, 160.97, 160.81, 152.91, 152.85, 140.98, 138.95, 135.77, 134.95, 132.83, 129.20, 129.14, 128.78, 128.72, 124.13, 123.92, 115.16, 114.99, 65.05, 57.83, 57.42, 51.55, 43.34, 34.36, 30.32, 30.26, 24.80, 24.72, 23.21, 23.09, 22.06, 22.03; HRMS(ESI): m/z calcd for C<sub>28</sub>H<sub>41</sub>FNO<sub>3</sub>(M+H)<sup>+</sup>- 458.3065, found 458.3058.

#### ethyl((3,5-di-tert-butyl-4-hydroxyphenyl)(4-fluorophenyl)methyl)-L-alaninate(3b):

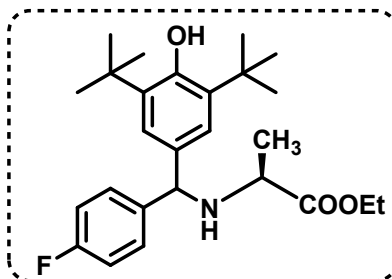

Light Yellow oil, isolated yield- 37mg (89%); R<sub>f</sub>(10% EtOAC/Hexane) - 0.5; IR ( in CH<sub>2</sub>Cl<sub>2</sub>):  $\nu_{max}$ ; 3396, 3020, 2964, 1725, 1508, 1434, 1216, 1156, 1047, 762; <sup>1</sup>H NMR(400MHz,CDCl<sub>3</sub>):  $\delta$  7.42-7.38 (1H,m), 7.34-7.30 (1H,m), 7.16 (1H,s), 7.09 (1H,s), 7.01-6.93 (2H,m), 5.09 (1H,s),

4.73-4.72 (1H,m), 4.22-4.15 (2H,m), 3.30-3.18 (1H,m), 1.41-1.39 (18H,m), 1.31-1.27 (6H,m);  $^{13}\text{C}$  NMR(100 MHz,CDCl<sub>3</sub>):  $\delta$  176.15, 176.04, 162.87, 152.87, 139.08, 135.80, 134.77, 129.05, 128.99, 128.95, 128.88, 123.94, 115.20, 115.04, 64.91, 64.75, 60.59, 60.53, 54.61, 54.38, 34.36, 30.37, 30.27, 19.60, 14.36; HRMS(ESI): m/z calcd for C<sub>26</sub>H<sub>37</sub>FNO<sub>3</sub> (M+H)<sup>+</sup>- 430.2752, found 430.2747.

**methyl((3,5-di-tert-butyl-4-hydroxyphenyl)(4-fluorophenyl)methyl)-L-serinate(3c):**

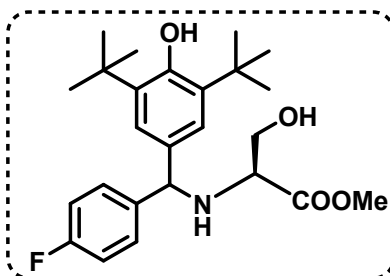

Light Yellow oil, isolated yield- 48mg (85%) ; R<sub>f</sub> (20% EtOAc/Hexane)- 0.4; IR( in CH<sub>2</sub>Cl<sub>2</sub>):  $\nu_{max}$ ; 3410, 3020, 2401, 1611, 1433, 1215, 1047, 760;  $^1\text{H}$  NMR (400MHz,CDCl<sub>3</sub>):  $\delta$  7.39-7.31 (2H,m), 7.14(1H,s), 7.09 (1H,s), 7.02-6.96 (2H,m), 5.14-5.13 (1H,m), 4.81 (1H,s), 3.76-3.70 (4H,m), 3.66-3.61 (1H,m), 3.41-3.34 (1H,m), 1.40-1.39 (18H,m);  $^{13}\text{C}$  NMR (100 MHz,CDCl<sub>3</sub>):  $\delta$  173.86, 173.72, 163.14, 160.77, 160.70, 153.07, 140.04, 138.48, 135.99, 133.92, 132.22, 129.19, 129.11, 128.90, 128.83, 124.04, 123.96, 115.43, 115.22, 64.99, 64.83, 63.22, 60.60, 60.35, 52.17, 34.39, 30.32, 30.25; HRMS(ESI): m/z calcd for C<sub>25</sub>H<sub>35</sub>FNO<sub>4</sub>(M+H)<sup>+</sup> - 432.2545, found 432.2542.

**methyl((3,5-di-tert-butyl-4-hydroxyphenyl)(4-fluorophenyl)methyl)-L-valinate(3d):**

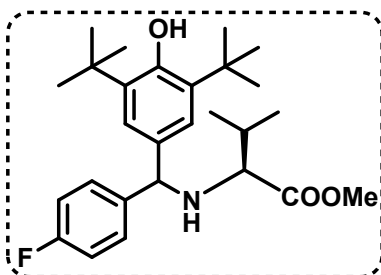

Light Yellow oil, isolated yield- 50.4mg (88%) ; R<sub>f</sub>(10% EtOAc/Hexane) - 0.5; IR(in CH<sub>2</sub>Cl<sub>2</sub>):  $\nu_{max}$ ; 3635, 3410, 2960, 1720, 1610, 1430, 1320, 1210, 1160, 1017, 761;  $^1\text{H}$  NMR (400MHz,CDCl<sub>3</sub>):  $\delta$  7.42-7.39 (1H,m), 7.34-7.31 (1H,m), 7.18 (1H,s), 7.12 (1H,s), 7.00-6.93 (2H,m), 5.10-5.08 (1H,s), 4.60 (1H,m), 3.72 (3H,s), 2.98-2.88 (1H,m), 1.96-1.86 (2H,m), 1.41-1.40 (18H, m), 0.98-0.92 (6H,m);  $^{13}\text{C}$  NMR (100 MHz,CDCl<sub>3</sub>):  $\delta$  176.10, 175.89, 163.13, 162.99, 160.69, 160.56, 152.84, 141.18, 139.02, 135.74, 135.11, 132.79, 129.26, 129.18, 128.83, 128.76, 124.11, 123.89, 115.23, 115.16, 115.02, 114.95, 65.24, 65.07, 64.63, 51.37, 34.36, 31.87,

31.81, 30.39, 30.29, 30.25, 19.86, 19.63, 18.66, 18.43; **HRMS(ESI):** m/z calcd for  $C_{27}H_{39}FNO_3(M+H)^+$ - 444.2908, found 444.2901.

**methyl((3,5-di-tert-butyl-4-hydroxyphenyl)(4-fluorophenyl)methyl)-L-phenylalaninate(3e):**

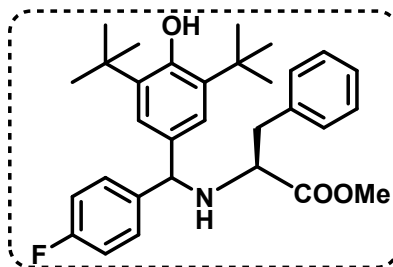

Yellow solid, isolated yield-57mg (89%); Mp-103°C;  $R_f$  (10% EtOAC/Hexane) - 0.6; **IR(in  $CH_2Cl_2$ ):**  $v_{max}$ : 3427, 3020, 1731, 1632, 1433, 1216, 1044, 761;  **$^1H$  NMR (400MHz,  $CDCl_3$ ):**  $\delta$  7.31-7.24 (4H,m), 7.22-7.14 (3H,m), 7.08 (1H,s), 7.04 (1H,s), 6.96-6.92 (1H,m), 6.85-6.81 (1H,m), 5.08-5.07 (1H,m), 4.67-4.65 (1H,m), 3.67-3.63 (3H,m), 3.48-3.31 (1H,m), 2.99-2.93 (2H,m), 1.39-1.36 (18H,m);  **$^{13}C$  NMR (100 MHz,  $CDCl_3$ ):**  $\delta$  175.32, 163.03, 160.56, 152.88, 140.56, 138.94, 137.83, 137.54, 135.78, 134.99, 132.81, 129.65, 129.31, 128.89, 128.81, 128.37, 128.17, 126.65, 126.59, 123.95, 123.70, 115.23, 115.15, 115.02, 114.94, 64.90, 64.84, 60.46, 60.42, 51.67, 51.57, 40.28, 40.17, 34.37, 34.33, 30.33, 30.27; **HRMS(ESI):** m/z calcd for  $C_{31}H_{39}FNO_3(M+H)^+$ - 492.2908, found 492.2897.

**ethyl((4-bromophenyl)(3,5-di-tert-butyl-4-hydroxyphenyl)methyl)-L-methioninate(3f):**

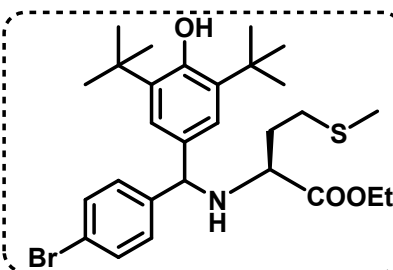

Light Yellow oil, isolated yield- 61mg (85%) ;  $R_f$ (10% EtOAC/Hexane) – 0.6; **IR(in  $CH_2Cl_2$ ):**  $v_{max}$ : 3635, 3332, 2962, 1725, 1435, 1350, 1210, 1120, 759;  **$^1H$  NMR (400MHz,  $CDCl_3$ ):**  $\delta$  7.44-7.38 (2H,m), 7.32- 7.30 (1H,m), 7.26-7.24 (1H,m), 7.14 (1H,s), 7.09 (1H,s), 5.12- 5.11 (1H,m), 4.67 (1H,s), 4.22-4.16 (2H,m), 3.27-3.19 (1H,m), 2.76-2.67 (1H,m), 2.61-2.53 (1H,m), 2.07-2.06 (3H,m), 1.94-1.90 ( 1H,m), 1.85-1.79 (1H,m), 1.41-1.39 (18H,m), 1.29-1.25 (3H,m);  **$^{13}C$  NMR (100 MHz,  $CDCl_3$ ):**  $\delta$  175.22, 175.08, 153.04, 153.00, 144.05, 142.32, 135.91, 134.41, 132.37, 131.51, 129.41, 128.99, 124.02, 123.87, 120.73, 65.23, 65.13, 60.78, 60.75, 58.39, 58.09, 34.39, 33.49, 33.46, 30.89, 30.74, 30.37, 30.27, 15.44, 15.38, 14.39; **HRMS(ESI):** m/z calcd for  $C_{28}H_{41}BrNO_3S(M+H)^+$  - 550.1985, found 550.1983.

**ethyl((4-bromophenyl)(3,5-di-tert-butyl-4-hydroxyphenyl)methyl)glycinate(3g):**

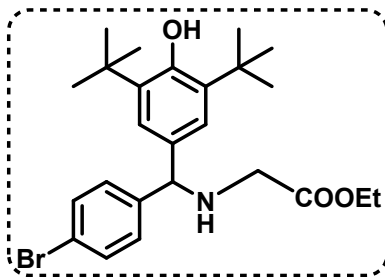

Light Yellow oil, isolated yield- 53.4mg (86%) ;  $R_f$ (10% EtOAc/Hexane)- 0.5; **IR**(in  $\text{CH}_2\text{Cl}_2$ ):  $\nu_{\text{max}}$ ; 3638, 3350, 2960, 1733, 1481, 1370, 1215, 1153, 1072, 840, 760;  **$^1\text{H}$  NMR** (400MHz, $\text{CDCl}_3$ ):  $\delta$  7.43-7.40 (2H,m), 7.32-7.29 (2H,m), 7.13 (2H,s), 5.11 (1H,s), 4.75 (1H,s), 4.20-4.15 (2H,m), 3.38-3.27 (2H,m), 1.40 (18H,s), 1.27-1.24 (3H,m);  **$^{13}\text{C}$  NMR** (100 MHz, $\text{CDCl}_3$ ):  $\delta$  172.59, 153.03, 142.93, 135.96, 133.48, 131.54, 129.16, 123.86, 120.69, 66.31, 60.72, 49.07, 34.38, 30.31, 14.25; **HRMS(ESI)**: m/z calcd for  $\text{C}_{25}\text{H}_{35}\text{BrNO}_3$  (M+H) $^+$ - 476.1795, found 476.1708.

**methyl ((4-bromophenyl)(3,5-di-tert-butyl-4-hydroxyphenyl)methyl)-L-leucinate(3h):**

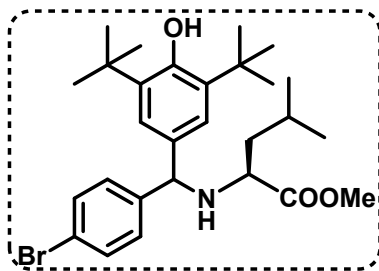

Yellow solid, isolated yield- 57.5mg (85%); Mp-109°C; $R_f$  (10% EtOAc/Hexane) - 0.6; **IR**(in  $\text{CH}_2\text{Cl}_2$ ):  $\nu_{\text{max}}$ ; 3636, 3433, 2956, 1732, 1433, 1313, 1200, 1154, 1119, 1070, 814, 762;  **$^1\text{H}$  NMR** (400MHz, $\text{CDCl}_3$ ):  $\delta$  7.43-7.37(2H,m), 7.33-7.31 (1H,m), 7.28-7.25 (1H,m), 7.14 (1H,s), 7.09 (1H,s), 5.10-5.09 (1H,m), 4.62-4.61 (1H,m), 3.70 (3H,s), 3.16-3.12 (1H,m), 1.94-1.89 (2H,m), 1.47-1.45 (1H,m), 1.40-1.39 (18H,m), 0.90-0.89 (3H,m), 0.82-0.76 (3H,m);  **$^{13}\text{C}$  NMR** (100 MHz, $\text{CDCl}_3$ ):  $\delta$  176.79, 176.62, 152.99, 152.95, 144.25, 142.49, 135.81, 134.60, 132.49, 131.45, 129.40, 128.96, 124.08, 123.88, 120.65, 120.61, 65.24, 65.16, 57.87, 51.59, 43.33, 34.36, 30.31, 30.26, 24.82, 24.71, 23.24, 23.11, 22.11, 22.05; **HRMS(ESI)**: m/z calcd for  $\text{C}_{28}\text{H}_{41}\text{BrNO}_3$  (M+H) $^+$ - 520.2264, found 520.2232.

**methyl((4-bromophenyl)(3,5-di-tert-butyl-4-hydroxyphenyl)methyl)-L-phenylalaninate(3i):**

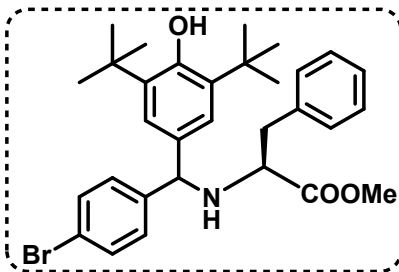

Yellow solid, isolated yield- 62.7mg (87%) ; Mp-110°C;  $R_f$  (10% EtOAC/Hexane) - 0.5; **IR (in  $\text{CH}_2\text{Cl}_2$ ):**  $\nu_{\text{max}}$ : 3409, 3020, 2401, 1432, 1216, 1047, 761;  **$^1\text{H NMR}$  (400MHz,  $\text{CDCl}_3$ ):**  $\delta$  7.39-7.37 (1H,m), 7.29-7.13 (7H,m), 7.08 (1H,s), 7.02 (1H,s), 6.98-6.96 (1H,m), 5.08-5.07 (1H,m), 4.65-4.62 (1H,m), 3.67-3.63 (3H,m), 3.47-3.29 (1H,m), 2.99-2.79 (2H,m), 1.38-1.36 (18H, m);  **$^{13}\text{C NMR}$  (100 MHz,  $\text{CDCl}_3$ ):**  $\delta$  175.25, 152.98, 152.94, 143.86, 142.47, 137.79, 137.49, 135.85, 134.66, 132.47, 131.47, 131.40, 129.69, 129.31, 129.08, 128.39, 128.19, 126.68, 126.64, 123.93, 123.65, 120.67, 120.49, 65.02, 60.45, 60.31, 51.71, 51.61, 40.28, 40.15, 34.38, 34.34, 30.34, 30.27; **HRMS(ESI):** m/z calcd for  $\text{C}_{31}\text{H}_{39}\text{BrNO}_3$  (M+H)<sup>+</sup>- 552.2108, found 552.2102.

**methyl([1,1'-biphenyl]-4-yl(3,5-di-tert-butyl-4-hydroxyphenyl)methyl)-L-phenylalaninate(3j):**

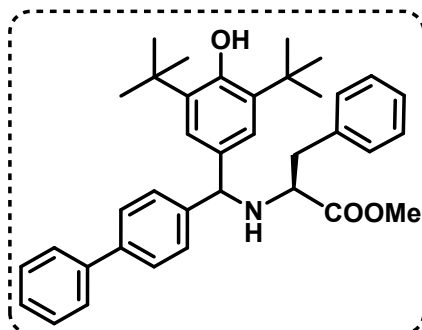

Light Yellow oil, isolated yield- 60.4mg (84%) ;  $R_f$  (10% EtOAC/Hexane)- 0.5; **IR (in  $\text{CH}_2\text{Cl}_2$ ):**  $\nu_{\text{max}}$ : 3420, 3010, 2402, 1431, 1215, 1045, 762;  **$^1\text{H NMR}$  (400MHz,  $\text{CDCl}_3$ ):**  $\delta$  7.55-7.49 (3H,m), 7.43-7.36 (4H,m), 7.30-7.16 (8H,m), 7.12 (1H,s), 5.07 (1H,s), 4.74-4.73 (1H,m), 3.66-3.63 (3H,m), 3.52-3.42 (1H,m), 3.02-2.86 (2H,m), 1.40-1.37 (18H,m);  **$^{13}\text{C NMR}$  (100 MHz,  $\text{CDCl}_3$ ):**  $\delta$  175.42, 152.94, 143.99, 142.59, 141.13, 141.07, 139.88, 139.71, 137.89, 137.68, 135.80, 135.19, 132.98, 129.75, 129.41, 128.77, 128.42, 128.23, 127.78, 127.23, 127.16, 127.09, 126.67, 124.12, 123.84, 65.46, 65.40, 60.52, 60.45, 51.67, 51.59, 40.38, 40.29, 34.44, 34.40, 30.43, 30.36; **HRMS(ESI):** m/z calcd for  $\text{C}_{37}\text{H}_{44}\text{NO}_3$  (M+H)<sup>+</sup>- 550.3316, found 550.3300.

**ethyl ([1,1'-biphenyl]-4-yl(3,5-di-tert-butyl-4-hydroxyphenyl)methyl)-L-methioninate(3k):**



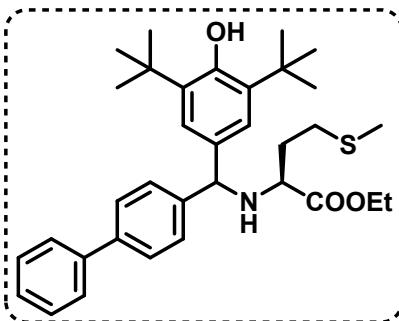

Light Yellow oil, isolated yield- 73mg (83%) ;  $R_f$  (10% EtOAC/Hexane)- 0.5; **IR**(in  $\text{CH}_2\text{Cl}_2$ ):  $\nu_{\text{max}}$ ; 3400, 3020, 1725, 1433, 1216, 1043, 762;  **$^1\text{H}$  NMR** (400MHz, $\text{CDCl}_3$ ):  $\delta$  7.59-7.49 (5H,m), 7.45-7.37 (3H,m), 7.32-7.27 (1H,m), 7.23(1H,s), 7.19 (1H,s), 5.10-5.09 (1H,m), 4.77-4.76 ( 1H,m), 4.23-4.18 (2H,m), 3.32-3.28 (1H,m), 2.80-2.54 (2H,m), 2.07- 2.06 ( 3H,m), 2.00-1.78 (2H,m), 1.42-1.40 (18H, m), 1.29-1.26 (3H,m);  **$^{13}\text{C}$  NMR** (100 MHz, $\text{CDCl}_3$ ):  $\delta$  175.38, 175.27, 152.98, 152.94, 144.13, 142.35, 141.06, 141.03, 139.90, 135.81, 134.95, 132.79, 128.75, 128.09, 127.69, 127.26, 127.17, 127.07, 124.20, 124.03, 65.57, 65.52, 60.77, 60.73, 58.49, 58.26, 34.42, 33.61, 30.95, 30.82, 30.43, 30.32, 15.46, 15.43, 14.45; **HRMS(ESI)**: m/z calcd for  $\text{C}_{34}\text{H}_{46}\text{NO}_3\text{S}(\text{M}+\text{H})^+$ - 548.3193, found 548.3176.

**methyl((3,5-di-tert-butyl-4-hydroxyphenyl)(4-(trifluoromethoxy)phenyl)methyl)-L-serinate(3l):**

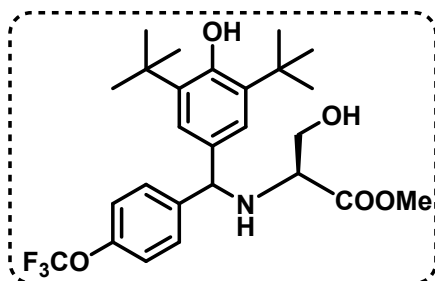

Light Yellow oil, isolated yield- 54mg (83%) ;  $R_f$  (20% EtOAC/Hexane)- 0.4; **IR**(in  $\text{CH}_2\text{Cl}_2$ ):  $\nu_{\text{max}}$ ; 3638, 3436, 3019, 2959, 2401, 1731, 1483, 1362, 1215, 1071, 761;  **$^1\text{H}$  NMR** (400MHz, $\text{CDCl}_3$ ):  $\delta$  7.45-7.39 (2H,m), 7.18-7.14 (3H, m), 7.09 (1H,s), 5.16-5.15 (1H,m), 4.84-4.83 (1H,m), 3.78-3.74 (4H,m), 3.68-3.63 (1H,m), 3.41-3.34 (1H,m), 1.41-1.40 (18H,m);  **$^{13}\text{C}$  NMR** (100 MHz, $\text{CDCl}_3$ ):  $\delta$  173.99, 173.66, 153.17, 148.24, 142.96, 141.55, 136.09, 133.59, 131.96, 128.92, 128.66, 124.05, 123.99, 121.03, 120.98, 65.02, 64.90, 63.27, 60.63, 60.34, 52.18, 34.39, 30.30, 30.22; **HRMS(ESI)**: m/z calcd for  $\text{C}_{26}\text{H}_{35}\text{F}_3\text{NO}_5(\text{M}+\text{H})^+$ - 498.2462, found 498.2466.

**methyl((6-bromo-2-methoxyquinolin-3-yl)(3,5-di-tert-butyl-4-hydroxyphenyl)methyl)-L-phenylalaninate(3m):**

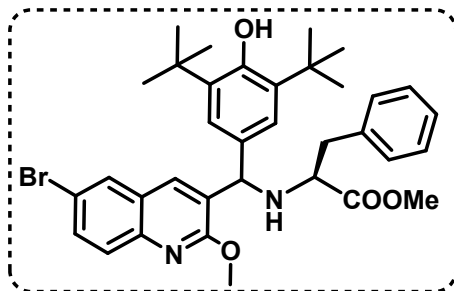

Light Yellow oil, isolated yield- 49mg (70%) ;  $R_f$ (10% EtOAC/Hexane)- 0.5; **IR**( in  $\text{CH}_2\text{Cl}_2$ ):  $\nu_{max}$ ; 3410, 3023, 2401, 1430, 1210, 1042, 760 ;  $^1\text{H NMR}$  (400MHz, $\text{CDCl}_3$ ):  $\delta$  7.96 (1H,s), 7.83-7.82 (1H,m), 7.65-7.56 (2H,m), 7.43-7.37 (2H,m), 7.32-7.21 (3H,m), 7.18-7.16 (2H,m), 7.11 (1H,s), 5.08-5.02 (2H,m), 4.02-3.95 (3H,m), 3.73-3.60 (3H,m), 3.48-3.32 (1H,m), 3.07-2.96 (1H,m), 2.79-2.67 (1H,m), 1.38-1.36 (18H,m);  $^{13}\text{C NMR}$  (100 MHz, $\text{CDCl}_3$ ):  $\delta$  175.35, 174.99, 160.87, 160.27, 152.97, 152.89, 144.11, 143.97, 138.37, 137.56, 135.62, 135.50, 133.94, 133.64, 133.21, 132.05, 131.76, 131.11, 130.20, 129.95, 129.89, 129.52, 129.28, 128.63, 128.46, 128.41, 128.21, 126.79, 126.67, 124.42, 124.14, 117.04, 116.63, 60.86, 60.31, 59.05, 58.26, 53.50, 53.38, 51.87, 51.59, 40.36, 40.18, 34.34, 34.31, 30.34, 30.27; **HRMS(ESI)**:  $m/z$  calcd for  $\text{C}_{35}\text{H}_{42}\text{BrN}_2\text{O}_4$  (M+H) $^+$ - 633.2322, found 633.2319.

**ethyl((3,5-di-tert-butyl-4-hydroxyphenyl)(4-(trifluoromethyl)phenyl)methyl)-L-tyrosylglycinate(3n):**

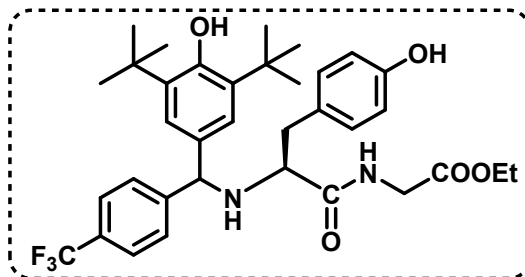

Light Yellow oil, isolated yield- 56mg (68%) ;  $R_f$ (40% EtOAC/Hexane)- 0.4; **IR**( in  $\text{CH}_2\text{Cl}_2$ ):  $\nu_{max}$ ; 3398, 3020, 1741, 1662, 1516, 1436, 1325, 1216, 1124, 1067, 762;  $^1\text{H NMR}$  (400MHz, $\text{CDCl}_3$ ):  $\delta$  7.71-7.60 (1H,m), 7.54- 7.39 ( 3H,m), 7.00-6.95 (3H,m), 6.86 (1H,s), 6.78-6.70 (2H,m), 5.15-5.14 (1H,m), 4.73-4.70 (1H,m), 4.26-4.19 (2H,m), 4.11-3.92 (2H, m), 3.41-3.31 (1H,m), 3.21-3.04 (1H,m), 2.88-2.82 (1H,m), 1.36- 1.35 (18H, m), 1.31-1.28 (3H,m);  $^{13}\text{C NMR}$  (100 MHz, $\text{CDCl}_3$ ):  $\delta$  174.46, 174.28, 169.69, 155.39, 155.12, 153.21, 153.07, 147.44, 136.15, 136.01, 132.82, 132.37, 130.47, 130.34, 128.48, 127.74, 127.49, 125.37, 124.03, 123.81, 115.68, 65.21, 64.74, 61.53, 61.31, 61.17, 41.12, 41.07, 38.02, 34.36, 34.31, 30.18, 14.14; **HRMS(ESI)**:  $m/z$  calcd for  $\text{C}_{35}\text{H}_{44}\text{F}_3\text{N}_2\text{O}_5$ (M+H) $^+$ - 629.3197, found 629.3195.

**methyl((3,5-di-tert-butyl-4-hydroxyphenyl)(4-(trifluoromethyl)phenyl)methyl)-L-valinate (3o):**

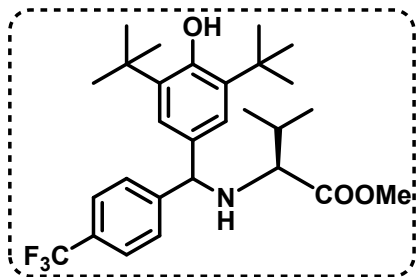

Light Yellow oil, isolated yield- 55.5mg (86%) ;  $R_f$ (10% EtOAC/Hexane)- 0.5; **IR (in  $\text{CH}_2\text{Cl}_2$ ):**  $\nu_{\text{max}}$ ; 3638, 3412, 2961, 1728, 1618, 1433, 1324, 1216, 1161, 1067, 762;  **$^1\text{H}$  NMR (400MHz,  $\text{CDCl}_3$ ):**  $\delta$  7.59-7.49 (4H,m), 7.18 (1H,s), 7.13 (1H,s), 5.12-5.11 (1H,m), 4.67-4.66 (1H,m), 3.72 (3H,s), 2.99-2.87 (1H,m), 1.98-1.88 (1H, m), 1.41-1.40 (18H, m), 0.99-0.94 (6H,m);  **$^{13}\text{C}$  NMR (100 MHz,  $\text{CDCl}_3$ ):**  $\delta$  175.94, 175.73, 153.09, 153.05, 149.28, 147.72, 135.91, 135.89, 134.41, 132.12, 127.95, 127.52, 125.43, 125.39, 125.39, 125.33, 125.29, 124.13, 123.87, 65.74, 65.59, 65.17, 64.43, 51.42, 34.37, 31.89, 31.78, 30.35, 30.22, 19.88, 19.62, 18.63, 18.34; **HRMS(ESI):** m/z calcd for  $\text{C}_{28}\text{H}_{39}\text{F}_3\text{NO}_3$  (M+H) $^+$ - 494.2877, found 494.2875.

**ethyl ((3,5-di-tert-butyl-4-hydroxyphenyl)(thiophen-2-yl)methyl)-L-methioninate(3p):**

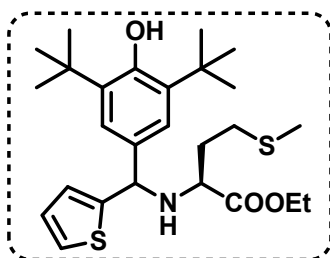

Light Yellow oil, isolated yield- 57.5mg (75%) ;  $R_f$  (10% EtOAC/Hexane)- 0.5; **IR (in  $\text{CH}_2\text{Cl}_2$ ):**  $\nu_{\text{max}}$ ; 3638, 3334, 2960, 1726, 1434, 1366, 1297, 1159, 1026, 889, 759 ;  **$^1\text{H}$  NMR (400MHz,  $\text{CDCl}_3$ ):**  $\delta$  7.22-7.14 (3H,m), 6.91-6.87 (2H), 5.13-5.12 (1H,m), 4.99-4.98 (1H,m), 4.23- 4.16 (2H,m), 2.78-2.50 (2H,m), 2.08-2.05 (3H,m), 1.98-1.74 (2H,m), 1.42-1.41 (18H,m), 1.29-1.26 (3H,m);  **$^{13}\text{C}$  NMR (100MHz,  $\text{CDCl}_3$ ):**  $\delta$  175.09, 175.04, 153.18, 153.10, 149.52, 148.68, 135.78, 134.37, 132.58, 126.43, 126.39, 124.74, 124.52, 124.26, 124.22, 124.03, 123.95, 61.89, 61.27, 60.78, 60.75, 58.40, 57.84, 34.39, 33.52, 33.38, 30.82, 30.74, 30.38, 30.28, 15.40, 14.40; **HRMS(ESI):** m/z calcd for  $\text{C}_{26}\text{H}_{40}\text{NO}_3\text{S}_2$  (M+H) $^+$ - 478.2444, found 478.2453.

**tert-butyl 3-((3,5-di-tert-butyl-4-hydroxyphenyl)((2-ethoxy-2-oxoethyl)amino)methyl)-1H-indole-1-carboxylate(3q):**

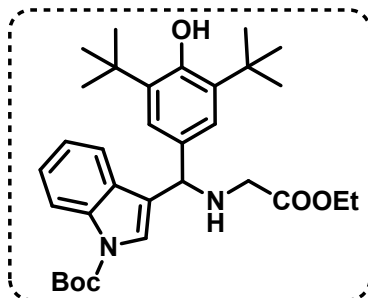

Light Yellow oil, isolated yield- 41.6mg (70%) ;  $R_f$  (10% EtOAc/Hexane)- 0.4; **IR** (in  $\text{CH}_2\text{Cl}_2$ ):  $\nu_{\text{max}}$ ; 3398, 3020, 2963, 1729, 1451, 1373, 1216, 1156, 765;  **$^1\text{H}$  NMR** (400MHz,  $\text{CDCl}_3$ ):  $\delta$  8.12-8.09 (1H,m), 7.76-7.74 (1H,m), 7.49 (1H,s), 7.29-7.25 (3H,m), 7.21-7.17 (1H,m), 5.11 (1H, s), 5.06 (1H,s), 4.22-4.16 (2H,m), 3.42 (2H,s), 1.65 (9H,s), 1.41 (18H,s), 1.28-1.24 (3H,m);  **$^{13}\text{C}$  NMR** (100MHz,  $\text{CDCl}_3$ ):  $\delta$  172.84, 153.05, 149.81, 135.80, 132.54, 129.46, 124.27, 123.35, 122.39, 120.23, 115.18, 83.46, 60.67, 59.43, 48.95, 34.38, 30.35, 28.24, 14.26; **HRMS(ESI)**:  $m/z$  calcd for  $\text{C}_{32}\text{H}_{45}\text{N}_2\text{O}_5$  (M+H) $^+$ - 537.3323, found 537.3320.

**methyl ((3,5-di-tert-butyl-4-hydroxyphenyl)(pyren-1-yl)methyl)-L-leucinate(3r):**

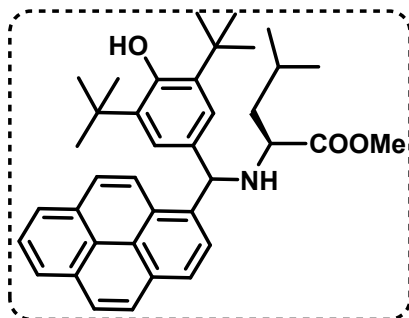

Orange oil, isolated yield- 48mg (71%) ;  $R_f$  (10% EtOAc/Hexane)- 0.5; **IR** (in  $\text{CH}_2\text{Cl}_2$ ):  $\nu_{\text{max}}$ ; 3400, 3019, 2924, 1729, 1611, 1435, 1212, 1038, 760;  **$^1\text{H}$  NMR** (400MHz,  $\text{CDCl}_3$ ):  $\delta$  8.58-8.46 (1H,m), 8.34-8.32 (1H,m), 8.18-8.13 (1H,m), 8.07-8.02 (3H,m), 7.95-7.93 (1H,m), 7.91 (1H,s), 7.89-7.84 (1H,m), 7.27 (1H,m), 7.19 (1H,s), 5.78-5.77 (1H,m), 4.98-4.97 (1H,m), 3.64-3.59 (3H,m), 3.32-3.13 (1H,m), 1.97-1.87 (1H,m), 1.54-1.36 (2H,m), 1.31-1.26 (18H,m), 0.85-0.69 (6H,m);  **$^{13}\text{C}$  NMR** (100MHz,  $\text{CDCl}_3$ ):  $\delta$  177.06, 176.82, 152.81, 152.78, 138.57, 136.49, 135.71, 134.88, 132.76, 131.41, 130.77, 130.73, 130.33, 130.26, 129.07, 128.12, 127.61, 127.49, 127.13, 127.02, 126.89, 125.77, 125.74, 125.19, 125.15, 125.09, 125.03, 124.97, 124.79, 124.75, 124.73, 124.40, 123.06, 61.12, 60.89, 58.12, 57.56, 51.59, 51.55, 43.52, 43.46, 34.38, 34.35, 30.35, 30.26, 24.87, 23.19, 23.16, 22.28, 22.17; **HRMS(ESI)**:  $m/z$  calcd for  $\text{C}_{38}\text{H}_{46}\text{NO}_3$  (M+H) $^+$ - 564.3472, found 564.3457.

**methyl ((3,5-di-tert-butyl-4-hydroxyphenyl)(pyren-1-yl)methyl)-L-phenylalaninate(3s):**



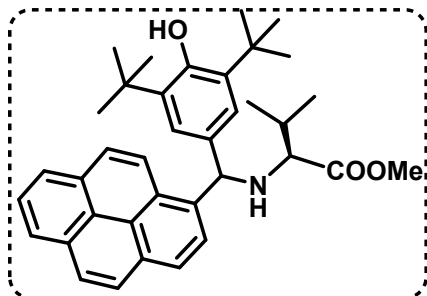

Light brown oil, isolated yield- 46.5mg (70%) ;  $R_f$  (10% EtOAC/Hexane)- 0.6; **IR(in  $\text{CH}_2\text{Cl}_2$ ):**  $\nu_{\text{max}}$ ; 3392, 3015, 2904, 1737, 1614, 1439, 1217, 1036, 760;  **$^1\text{H NMR}$  (400MHz, $\text{CDCl}_3$ ):**  $\delta$  8.57-8.43 (1H,m), 8.22-8.20 (1H,m), 8.15-8.09 (3H,m), 8.04-8.00 (2H,m), 7.98-7.90 (2H,m), 7.39-7.31 (2H,m), 5.82-5.81 (1H,m), 5.06-5.05 (1H,m), 3.72-3.69 (3H,m), 2.56-2.51 (1H,m), 2.01-1.92 (1H,m), 1.39-1.35 (18H,m), 1.05-0.94 (6H,m);  **$^{13}\text{C NMR}$  (100MHz, $\text{CDCl}_3$ ):**  $\delta$  176.25, 176.08, 152.78, 138.81, 136.58, 135.71, 135.00, 132.90, 131.42, 130.79, 130.74, 130.26, 129.14, 128.16, 127.60, 127.51, 127.11, 127.06, 126.92, 125.79, 125.74, 125.48, 125.36, 125.22, 125.17, 125.07, 125.02, 124.98, 124.74, 124.39, 123.18, 123.09, 65.42, 64.93, 61.31, 61.06, 51.42, 51.37, 34.43, 34.37, 32.02, 30.44, 30.28, 19.89, 19.74, 18.86, 18.79; **HRMS(ESI):** m/z calcd for  $\text{C}_{37}\text{H}_{44}\text{NO}_3$  (M+H)<sup>+</sup>- 550.3316, found 550.3320.

**methyl ((3,5-di-tert-butyl-4-hydroxyphenyl)(pyren-1-yl)methyl)-L-tyrosinate(3v):**

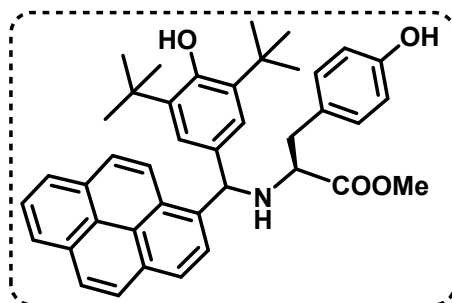

Orange oil, isolated yield- 44.5mg (60%) ;  $R_f$  (20% EtOAC/Hexane)- 0.4; **IR(in  $\text{CH}_2\text{Cl}_2$ ):**  $\nu_{\text{max}}$ ; 3401, 3020, 2926, 1730, 1610, 1436, 1215, 1037, 760;  **$^1\text{H NMR}$  (400MHz, $\text{CDCl}_3$ ):**  $\delta$  8.57-8.55 (1H,m), 8.16-8.09 (4H,m), 8.06-7.94 (4H,m), 7.27-7.26 (2H,m), 7.06-7.03 (2H,m), 6.76-6.72 (2H,m), 5.86-5.85 (1H,m), 5.06-5.04 (1H,m), 3.64-3.62 (3H,m), 3.40-3.27 (1H,m), 2.96-2.83 (2H,m), 1.35-1.34 (18H,m);  **$^{13}\text{C NMR}$  (100MHz, $\text{CDCl}_3$ ):**  $\delta$  171.19, 154.68, 135.71, 130.72, 130.45, 128.89, 127.49, 127.43, 127.02, 125.69, 125.38, 125.13, 124.98, 124.79, 124.48, 124.21, 115.28, 115.08, 67.97, 60.41, 51.55, 34.31, 31.93, 30.30, 30.22; **HRMS(ESI):** m/z calcd for  $\text{C}_{41}\text{H}_{44}\text{NO}_4$  (M+H)<sup>+</sup>- 614.3265, found 614.3259.

**methyl((2,5-bis(benzyloxy)phenyl)(3,5-di-tert-butyl-4-hydroxyphenyl)methyl)-L-valinate(3w):**

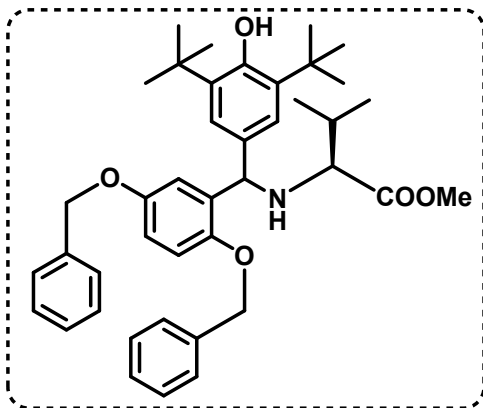

Light Yellow oil, isolated yield- 58mg (83%) ;  $R_f$  (10% EtOAC/Hexane)- 0.5; **IR (in  $\text{CH}_2\text{Cl}_2$ ):**  $\nu_{\text{max}}$ ; 3398, 2955, 1731, 1492, 1200, 1028, 739;  **$^1\text{H}$  NMR (400MHz,  $\text{CDCl}_3$ ):**  $\delta$  7.51-7.50 (1H,m), 7.43-7.41 (3H,m), 7.39-7.25 (13H,m), 7.21-7.18 (3H,m), 6.76-6.71 (3H,m), 5.16-5.11 (2H,m), 5.04-5.03 (3H,m), 5.01-4.99 (2H,m), 4.93-4.92 (2H,m), 3.63-3.59 (4H,m), 2.99-2.87 (1H,m), 1.92-1.83 (2H,m), 1.35-1.34 (27H,m), 1.01-0.90 (9H,m);  **$^{13}\text{C}$  NMR (100MHz,  $\text{CDCl}_3$ ):**  $\delta$  176.20, 153.43, 153.27, 152.65, 152.55, 150.97, 149.86, 137.69, 137.57, 137.46, 135.47, 135.40, 135.24, 134.80, 133.38, 133.07, 128.89, 128.56, 128.45, 128.41, 127.89, 127.83, 127.61, 127.56, 127.41, 127.09, 126.92, 124.52, 124.26, 114.55, 114.07, 113.92, 113.52, 113.08, 112.99, 70.67, 70.62, 65.49, 64.68, 58.17, 58.04, 51.25, 51.12, 34.31, 31.92, 31.84, 30.38, 30.29, 19.75, 19.62, 19.04, 18.76; **HRMS(ESI):** m/z calcd for  $\text{C}_{41}\text{H}_{52}\text{NO}_5(\text{M}+\text{H})^+$  - 638.3840, found 638.3832.

**ethyl((3,5-di-tert-butyl-4-hydroxyphenyl)(4-(trifluoromethoxy)phenyl)methyl)-L-phenylalanyl-L-alanylglycinate(3x):**

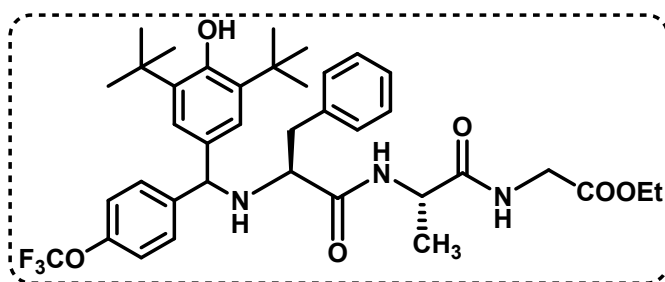

Light Yellow oil, isolated yield- 68mg (75%) ;  $R_f$  (40% EtOAC/Hexane)- 0.4; **IR (in  $\text{CH}_2\text{Cl}_2$ ):**  $\nu_{\text{max}}$ ; 3638, 3348, 3018, 2962, 2402, 1743, 1658, 1507, 1437, 1378, 1260, 1166, 1021, 926, 850, 761;  **$^1\text{H}$  NMR (400MHz,  $\text{CDCl}_3$ ):**  $\delta$  7.55-7.44 (1H,m), 7.37-7.33 (1H,m), 7.31-7.29 (2H,m), 7.24-7.20 (1H,m), 7.17-7.11 (3H,m), 7.00-6.96 (1H,m), 6.91-6.78 (2H,m), 5.27(1H,s), 5.16-5.15 (1H,m), 4.73-4.67 (1H,m), 4.60-4.49 (1H,m), 4.22-4.16 (2H,m), 4.07-3.91 (2H,m), 3.38-3.22 (1H,m), 3.18-3.09 (1H,m), 3.00-2.73 (1H,m), 2.03 (2H,s), 1.37-1.23 (24H,m);  **$^{13}\text{C}$  NMR (100MHz,  $\text{CDCl}_3$ ):**  $\delta$  174.15, 174.06, 173.78, 172.19, 169.70, 169.61, 153.14, 148.16, 148.00, 141.95, 141.39, 137.42, 137.21, 136.09, 135.97, 132.58, 129.49, 129.39, 129.24, 128.91, 128.72, 128.59, 127.06, 126.93, 124.09, 120.88, 64.95, 64.11, 61.46, 61.01, 53.42, 48.33, 41.28, 39.32,

38.79, 34.34, 30.23, 18.12, 14.12; **HRMS(ESI):** m/z calcd for  $C_{38}H_{49}F_3N_3O_6(M+Na)^+$ - 722.3387, found 722.3363.

**methyl ((3,5-di-tert-butyl-4-hydroxyphenyl)(phenyl)methyl)-L-leucinate (3y):**

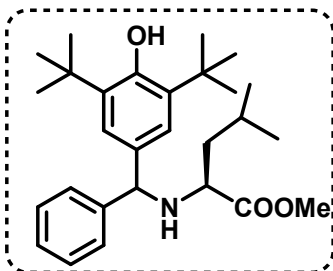

Light Yellow oil, isolated yield- 40mg (90%) ;  $R_f$  (10% EtOAC/Hexane) - 0.5; **IR(in  $CH_2Cl_2$ ):**  $\nu_{max}$ ; 3400, 2954, 1732, 1660, 1434, 1219, 1153, 1115, 768;  **$^1H$  NMR (400MHz,  $CDCl_3$ ):**  $\delta$  7.45-7.42 (1H,m), 7.39-7.37 (1H,m), 7.31-7.24 (2H,m), 7.19-7.17 ( 2H,m), 7.14 (1H,s), 5.07-5.05 (1H,m), 4.67-4.66 (1H,m), 3.70-3.69 (3H,m), 3.20-3.15 (1H,m), 1.99-1.86 (2H,m), 1.51-1.44 (1H,m), 1.40-1.39 (18H,m), 0.90-0.88 (3H,m), 0.81-0.77 (3H,m);  **$^{13}C$  NMR (100MHz,  $CDCl_3$ ):**  $\delta$  176.91, 176.82, 152.83, 152.78, 145.21, 143.29, 135.64, 135.19, 132.99, 128.38, 128.29, 127.74, 127.25, 126.95, 126.84, 124.24, 124.04, 65.83, 57.86, 57.48, 51.51, 43.39, 34.35, 30.34, 30.28, 24.82, 24.71, 23.24, 23.12, 22.10; **HRMS(ESI):** m/z calcd for  $C_{28}H_{42}NO_3(M+H)^+$ - 440.3159, found 440.3152.

**methyl ((3-chlorophenyl)(4-hydroxy-3,5-dimethylphenyl)methyl)-L-leucinate(3z):**

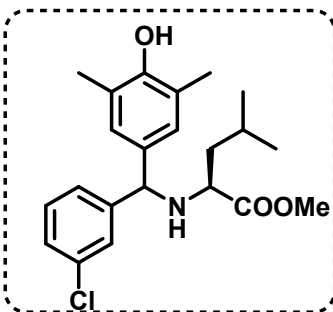

White solid, isolated yield- 39mg (84%); Mp- 120°C;  $R_f$  (10% EtOAC/Hexane)- 0.5;  **$^1H$  NMR (400MHz,  $CDCl_3$ ):**  $\delta$  7.36 (1H, s), 7.25-7.23 ( 1H,m), 7.21-7.13 (2H,m), 6.98 (2H,s), 4.65-4.61 (2H,m), 3.71-3.70 (3H,m), 3.23-3.15 ( 1H,m), 2.20 (6H,s), 2.02-1.92 ( 2H, m), 1.53-1.37 ( 2H,m), 0.91 (3H, d,  $J$ = 6.72 Hz), 0.81 (3H, d,  $J$ = 6.50 Hz);  **$^{13}C$  NMR (100MHz,  $CDCl_3$ ):**  $\delta$  176.73, 151.50, 147.05, 134.22, 133.48, 129.72, 127.62, 127.31, 127.18, 127.13, 125.39, 123.12, 64.47, 57.30, 51.65, 43.25, 24.69, 23.20, 21.67, 16.01; **HRMS(ESI):** m/z calcd for  $C_{22}H_{29}ClNO_3$  (M+H)<sup>+</sup>- 390.1830, found 390.1824.



**methyl ((3,5-di-tert-butyl-4-hydroxyphenyl)(phenyl)methyl)-D-prolinate (3z')**

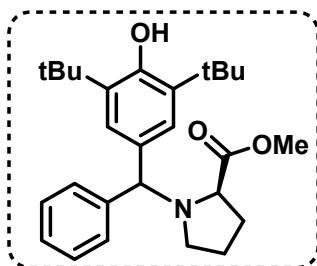

Light yellow oil. isolated yield- 49mg (75%);  $R_f$  (10% EtOAC/Hexane)- 0.5;  $^1\text{H NMR}$  (400MHz,  $\text{CDCl}_3$ ):  $\delta$  7.48-7.46 (3H,m), 7.25-7.24 (1H,m), 7.20-7.15 (3H,m), 5.03 (1H,s), 4.55 (1H,s), 3.39 (3H,s), 3.03-2.98 (1H,m), 2.53-2.47 (1H,m), 2.16-2.06 (1H,m), 1.95-1.75 (4H,m), 1.39 (18H,s);  $^{13}\text{C NMR}$  (100MHz,  $\text{CDCl}_3$ ):  $\delta$  175.42, 152.66, 144.05, 135.22, 130.36, 128.25, 127.83, 126.69, 125.08, 73.97, 63.65, 52.99, 51.09, 34.30, 30.35, 29.56, 23.69; **HRMS(ESI)**: m/z calcd for  $\text{C}_{22}\text{H}_{29}\text{ClNO}_3$  (M+H) $^+$ - 424.2846, found 424.2835.

**ethyl N-((4-chlorophenyl)(3,5-di-tert-butyl-4-hydroxyphenyl)methyl)-N-tosylglycinate(5a)**

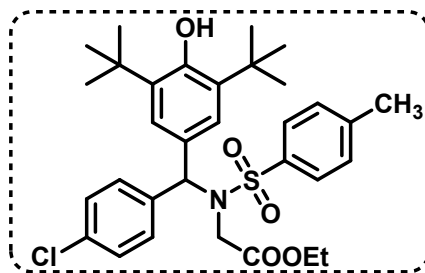

Light Yellow oil, isolated yield- 66mg (75%) ;  $R_f$  (20% EtOAC/Hexane)- 0.5; **IR(in  $\text{CH}_2\text{Cl}_2$ )**:  $\nu_{\text{max}}$ ; 3400, 2950, 2401, 1725, 1435, 1057,761;  $^1\text{H NMR}$  (400MHz,  $\text{CDCl}_3$ ):  $\delta$  7.78-7.76 (2H,m), 7.24-7.21 (4H,m), 7.17-7.15 (2H,m), 6.69 (2H,s),6.11 (1H,s), 5.17 (1H,s), 4.09-3.96 (2H,m), 3.90-3.82 (2H,m), 2.40 (3H,s), 1.28 (18H,s), 1.08-1.04 (3H,m);  $^{13}\text{C NMR}$  (100MHz,  $\text{CDCl}_3$ ):  $\delta$  169.05, 153.45, 143.42, 137.61, 137.24, 135.72, 133.32, 130.18, 129.32, 128.22, 128.13, 127.64, 126.01, 64.77, 60.95, 46.61, 34.21, 30.09, 21.49, 13.96; **HRMS(ESI)**: m/z calcd for  $\text{C}_{32}\text{H}_{44}\text{ClN}_2\text{O}_5\text{S}$  (M+NH<sub>4</sub>) $^+$ - 603.2654, found 603.2655.

**ethyl N-((2-bromophenyl)(3,5-di-tert-butyl-4-hydroxyphenyl)methyl)-N-tosylglycinate(5b)**

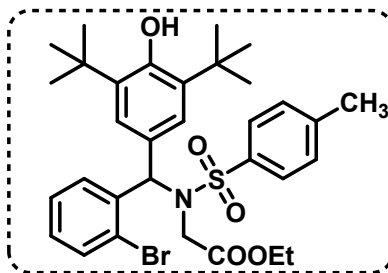

Light Yellow oil, isolated yield-75%;  $R_f$  (20% EtOAc/Hexane)- 0.5; **IR (in  $\text{CH}_2\text{Cl}_2$ )**:  $\nu_{\text{max}}$ : 3406, 2954, 2410, 1722, 1430, 1053, 761;  **$^1\text{H NMR}$  (400MHz,  $\text{CDCl}_3$ )**:  $\delta$  7.80-7.78 (2H,m), 7.59-7.57 (1H,m), 7.49-7.47 (1H,m), 7.25-7.21 (3H,m), 7.12-7.07 (1H,m), 6.61(2H,s), 6.35(1H,s), 5.14(1H,s), 4.15-4.09 (1H,m), 3.99-3.93 (3H,m), 2.39 (3H,s), 1.26 (18H,s), 1.14-1.11 (3H,m);  **$^{13}\text{C NMR}$  (100MHz,  $\text{CDCl}_3$ )**:  $\delta$  169.29, 153.41, 143.38, 139.47, 136.49, 135.65, 132.99, 129.54, 129.23, 128.69, 128.25, 127.11, 126.81, 126.52, 123.92, 65.33, 60.92, 47.74, 34.18, 30.08, 21.48, 14.03; **HRMS(ESI)**: m/z calcd for  $\text{C}_{32}\text{H}_{44}\text{BrN}_2\text{O}_5\text{S}(\text{M}+\text{NH}_4)^+$ - 647.2149, found 647.2144.

**Ethyl N-((6-bromo-2-methoxyquinolin-3-yl)(3,5-di-tert-butyl-4-hydroxyphenyl)methyl)-N-tosylglycinate(5c):**

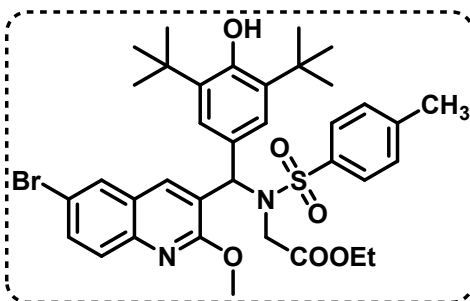

Light Yellow oil, isolated yield- 70%;  $R_f$  (20% EtOAc/Hexane)- 0.5; **IR(in  $\text{CH}_2\text{Cl}_2$ )**:  $\nu_{\text{max}}$ ; 3415, 2952, 2414, 1725, 1431, 1055, 761;  **$^1\text{H NMR}$  (400MHz,  $\text{CDCl}_3$ )**:  $\delta$  7.85 (1H,s), 7.76-7.75 (1H,m), 7.72-7.69 (2H,m), 7.66-7.65 (2H,m), 7.15- 7.13 (2H,m), 6.77 (2H,s), 6.42 (1H,s), 5.18 (1H,s), 4.10-3.94 (2H,m), 3.89 (3H,s), 3.87-3.79 (2H,m), 2.32 (3H,s), 1.29 (18H,s), 1.04-1.00 (3H,m);  **$^{13}\text{C NMR}$  (100MHz,  $\text{CDCl}_3$ )**:  $\delta$  169.39, 153.44, 144.56, 143.49, 136.86, 135.79, 132.58, 129.67, 129.21, 128.47, 127.98, 126.71, 126.07, 125.49, 125.21, 117.12, 60.99, 60.87, 53.56, 47.16, 34.27, 30.15, 21.41, 13.90; **HRMS(ESI)**: m/z calcd for  $\text{C}_{36}\text{H}_{47}\text{BrN}_3\text{O}_6\text{S}$  ( $\text{M}+\text{NH}_4$ ) $^+$ - 728.2363; found 728.2356.

**Ethyl N-((3,5-di-tert-butyl-4-hydroxyphenyl)(3,4,5-trimethoxyphenyl)methyl)-N-tosylglycinate(5d):**

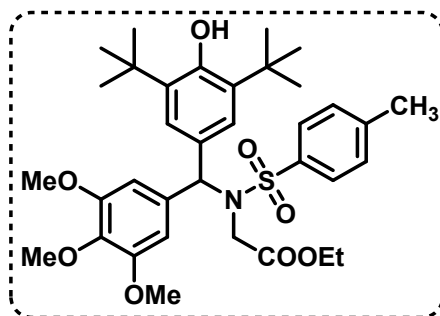

Light Yellow oil, isolated yield- 78%;  $R_f$ (20% EtOAC/Hexane)- 0.5; **IR(in  $\text{CH}_2\text{Cl}_2$ )**:  $\nu_{max}$ : 3420, 2957, 2418, 1729, 1438, 1053,761;  **$^1\text{H NMR}$  (400MHz, $\text{CDCl}_3$ )**:  $\delta$  7.75-7.73 (2H,m), 7.21-7.19 (2H,m), 6.83 (2H,s), 6.41(2H,s), 6.10 (1H,s), 5.18 (1H,s), 4.01-3.99 (2H,m), 3.95-3.88 (2H,m), 3.82 (3H,s), 3.70 (6H,s), 2.38 (3H,s), 1.32 (18H,s), 1.10-1.06 (3H,m);  **$^{13}\text{C NMR}$  (100MHz, $\text{CDCl}_3$ )**:  $\delta$  153.88, 152.80, 135.58, 134.24, 129.19, 128.16, 127.76, 126.05, 106.19, 65.49, 60.98, 60.79, 56.00, 53.42, 46.73, 34.25, 30.18, 21.47, 13.99; **HRMS(ESI)**: m/z calcd for  $\text{C}_{35}\text{H}_{51}\text{N}_2\text{O}_8\text{S}$  ( $\text{M}+\text{NH}_4$ )<sup>+</sup>- 659.3361, found 659.3320.

**ethylN-((2-bromo-5-methoxyphenyl)(3,5-di-tert-butyl-4-hydroxyphenyl)methyl)-N-tosylglycinate(5e):**

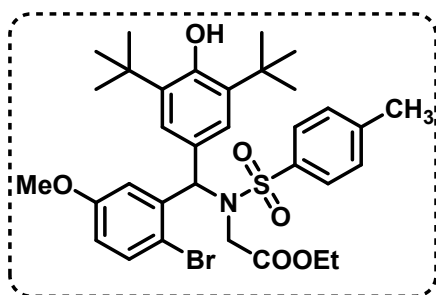

Light Yellow oil, isolated yield- 69%;  $R_f$ (20% EtOAC/Hexane)- 0.5; **IR(in  $\text{CH}_2\text{Cl}_2$ )**:  $\nu_{max}$ : 3426, 2951, 2419, 1723, 1431, 1051,761;  **$^1\text{H NMR}$  (400MHz, $\text{CDCl}_3$ )**:  $\delta$  7.76-7.74 (2H,m), 7.35-7.31 (2H,m), 7.23-7.21 (2H,m), 6.67-6.64 (3H,m), 6.28 (1H,s), 5.15 (1H,s), 4.05-3.96 (4H,m), 3.76 (3H,m), 2.39 (3H,s), 1.26 (18H,s), 1.17-1.14 (3H,m);  **$^{13}\text{C NMR}$  (100MHz, $\text{CDCl}_3$ )**:  $\delta$  169.54, 158.91, 153.51, 143.38, 140.42, 136.47, 135.74, 133.39, 129.22, 128.14, 126.61, 115.27, 114.76, 114.02, 65.63, 60.99, 55.55, 47.81, 34.19, 30.10, 21.46, 14.05; **HRMS(ESI)**: m/z calcd for  $\text{C}_{33}\text{H}_{46}\text{BrN}_2\text{O}_6\text{S}$  ( $\text{M}+\text{NH}_4$ )<sup>+</sup>- 677.2254, found 677.2249.

**ethylN-((3,5-di-tert-butyl-4-hydroxyphenyl)(4-(trifluoromethyl)phenyl)methyl)-N-(naphthalen-1-ylsulfonyl)glycinate(5f):**

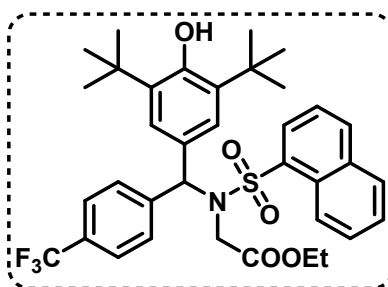

Light Yellow solid, isolated yield- 70%; Mp-125°C;  $R_f$  (20% EtOAC/Hexane)- 0.5; **IR(in  $\text{CH}_2\text{Cl}_2$ )**:  $\nu_{max}$ : 3411, 3020, 2401,1326, 1216,1066,762;  **$^1\text{H NMR}$  (400MHz, $\text{CDCl}_3$ )**:  $\delta$  8.79-8.76 (1H,m), 8.22-8.19 (1H,m), 7.94-7.92 (1H,m), 7.86-7.84 (1H,m), 7.64-7.60 (1H,m), 7.58-7.54 (1H,m), 7.39-7.33 (3H,m), 7.26-7.24 (2H,m), 6.74 (2H,s), 6.40 (1H,s), 5.15 (1H,s), 4.24-4.11 (2H,m), 3.79-3.65 (2H,m), 1.23 (18H,s), 0.93-0.89 (3H,m);  **$^{13}\text{C NMR}$  (100MHz, $\text{CDCl}_3$ )**:  $\delta$

168.71, 157.55, 143.26, 135.77, 135.46, 134.34, 134.21, 130.66, 128.96, 128.75, 128.16, 127.36, 126.74, 126.26, 125.03, 124.74, 124.04, 65.29, 60.95, 47.25, 34.16, 30.03, 13.75; **HRMS(ESI):** m/z calcd for C<sub>36</sub>H<sub>44</sub>F<sub>3</sub>N<sub>2</sub>O<sub>5</sub>S (M+NH<sub>4</sub>)<sup>+</sup>- 673.2918, found 673.2914.

**ethylN-((3,5-di-tert-butyl-4-hydroxyphenyl)(4-(trifluoromethoxy)phenyl)methyl)-N-(naphthalen-1-ylsulfonyl)glycinate(5g):**

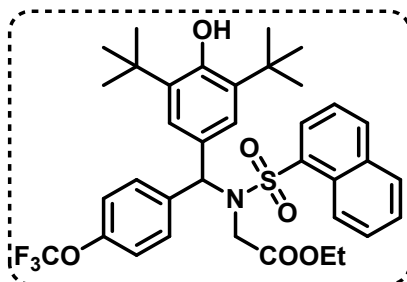

Yellow oil, isolated yield- 68%; **R<sub>f</sub>** (20% EtOAC/Hexane)- 0.5; **IR(in CH<sub>2</sub>Cl<sub>2</sub>):**  $\nu_{max}$ ; 3416, 3025, 2400, 1325, 1213, 1069, 762; **<sup>1</sup>H NMR (400MHz, CDCl<sub>3</sub>):**  $\delta$  8.79-8.77 (1H,m), 8.22-8.19 (1H,m), 7.94-7.84 (2H,m), 7.64-7.53 (2H,m), 7.39-7.35 (1H,m), 7.16-7.14 (2H,m), 6.95-6.93 (2H,m), 6.73 (2H,s), 6.38 (1H,s), 5.13 (1H,s), 4.18-4.17 (2H,m), 3.77-3.68 (2H,m), 1.23 (18H,s), 0.93-0.89 (3H,m); **<sup>13</sup>C NMR (100MHz, CDCl<sub>3</sub>):**  $\delta$  168.78, 153.40, 140.24, 137.81, 135.67, 135.56, 134.25, 134.19, 130.64, 129.98, 128.92, 128.11, 127.73, 126.69, 126.03, 125.06, 124.01, 120.25, 64.91, 60.93, 47.20, 34.15, 30.03, 13.73; **HRMS(ESI):** m/z calcd for C<sub>36</sub>H<sub>44</sub>F<sub>3</sub>N<sub>2</sub>O<sub>6</sub>S (M+NH<sub>4</sub>)<sup>+</sup>- 689.2867, found 689.2860.

**ethylN-((3,5-di-tert-butyl-4-hydroxyphenyl)(4-fluorophenyl)methyl)-N-(naphthalen-1-ylsulfonyl)glycinate(5h):**

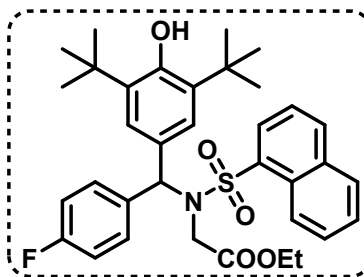

Yellow oil, isolated yield- 65%; **R<sub>f</sub>** (20% EtOAC/Hexane)- 0.4; **IR(in CH<sub>2</sub>Cl<sub>2</sub>):**  $\nu_{max}$ ; 3418, 3020, 2961, 2401, 1729, 1605, 1509, 1435, 1330, 1216, 1158, 1057, 927, 761; **<sup>1</sup>H NMR (400MHz, CDCl<sub>3</sub>):**  $\delta$  8.80-8.78 (1H,m), 8.24-8.21 (1H,m), 7.96-7.94 (1H,m), 7.87-7.85 (1H,m), 7.64-7.53 (2H,m), 7.41-7.37 (1H,m), 7.13-7.09 (2H,m), 6.84-6.79 (2H,m), 6.74 (2H,s), 6.37 (1H,s), 5.10 (1H,s), 4.17 (2H,s), 3.76-3.67 (2H,m), 1.23 (18H,s), 0.92-0.89 (3H,m); **<sup>13</sup>C NMR (100MHz, CDCl<sub>3</sub>):**  $\delta$  168.80, 163.17, 160.72, 153.25, 135.70, 135.56, 134.80, 134.77, 134.19, 130.59, 130.48, 130.40, 128.88, 128.08, 126.67, 125.83, 125.15, 124.03, 114.86, 114.64, 64.89,

60.89, 53.43, 47.09, 34.13, 30.04, 13.74; **HRMS(ESI):** m/z calcd for C<sub>35</sub>H<sub>44</sub>FN<sub>2</sub>O<sub>5</sub>S (M+NH<sub>4</sub>)<sup>+</sup>- 623.2949, found 623.2360.

**ethyl N-((3,5-di-tert-butyl-4-hydroxyphenyl)(pyren-1-yl)methyl)-N-tosylglycinate(5i):**

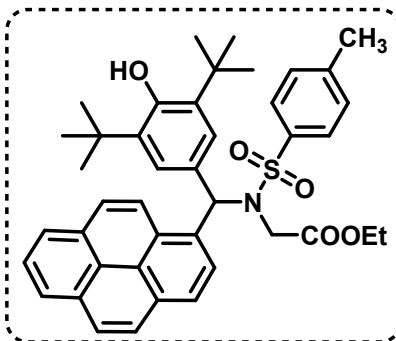

Yellow oil, isolated yield-60%; **R<sub>f</sub>**(20% EtOAC/Hexane)- 0.5; **IR(in CH<sub>2</sub>Cl<sub>2</sub>):**  $\nu_{max}$ : 3429, 2956, 2420, 1728, 1430, 1050,762; **<sup>1</sup>H NMR (400MHz,CDCl<sub>3</sub>):**  $\delta$  8.49-8.47 (1H,m), 8.21-8.18 (2H,m), 8.14-8.11 (1H,m), 8.07-8.03 (1H,m), 8.02-7.99 (2H,m), 7.74-7.72 (1H,m), 7.59-7.58 (2H,m), 7.32 (1H,s), 6.98-6.96 (2H,m), 6.85 (2H,s), 5.14 (1H,s), 4.31-4.09 (2H,m), 3.67-3.59 (1H,m), 3.52-3.44 (1H,m), 2.21 (3H,s), 1.26 (18H,s), 0.73-0.69 (3H,m); **<sup>13</sup>C NMR (100MHz,CDCl<sub>3</sub>):**  $\delta$  169.11, 153.14, 142.99, 136.92, 135.78, 132.40, 131.26, 131.01, 130.69, 129.59, 128.98, 128.93, 125.95, 127.91, 127.63, 127.33, 126.94, 125.98, 125.67, 125.25, 124.83, 124.57, 124.32, 123.66, 62.71, 60.72, 47.72, 34.21, 30.12, 21.32, 13.53; **HRMS(ESI):** m/z calcd for C<sub>42</sub>H<sub>49</sub>N<sub>2</sub>O<sub>5</sub>S(M+NH<sub>4</sub>)<sup>+</sup>- 693.3357; 693.3334.

**ethyl N-((1,1'-biphenyl-4-yl)(3,5-di-tert-butyl-4-hydroxyphenyl)methyl)-N-(naphthalen-1-ylsulfonyl)glycinate(5j):**

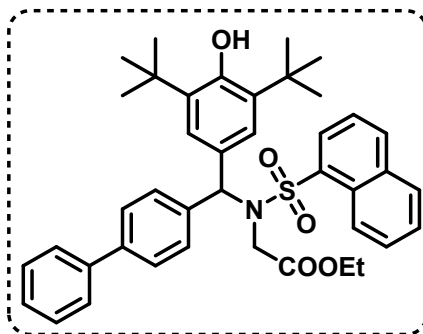

Yellow oil, isolated yield- 72%; **R<sub>f</sub>** (20% EtOAC/Hexane)- 0.5; **IR(in CH<sub>2</sub>Cl<sub>2</sub>):**  $\nu_{max}$ ; 2858, 1729, 1600, 1437, 1332, 1210, 1158, 1061, 974, 888, 799, 761, 696; **<sup>1</sup>H NMR (400MHz,CDCl<sub>3</sub>):**  $\delta$  8.83-8.81 (1H,m), 8.25-8.23 (1H,m), 7.94-7.92 (1H,m), 7.85-7.83 (1H,m), 7.65-7.61 (1H,m), 7.56-7.51 (3H,m), 7.44-7.39 (3H,m), 7.37-7.33 (3H,m),7.19-7.17 (2H,m),6.82 (2H,s), 6.42 (1H,s), 5.10 (1H,s),4.31-4.18 (2H,m), 3.74-3.65 (2H,m), 1.24 (18H,s), 0.89-0.86 (3H,m); **<sup>13</sup>C NMR (100MHz,CDCl<sub>3</sub>):**  $\delta$  168.94, 153.22, 140.61, 140.05, 137.94, 135.88, 134.18,

134.07, 130.61, 129.15, 128.82, 128.76, 128.25, 128.03, 127.31, 126.97, 126.61, 126.56, 126.02, 125.26, 124.04, 65.41, 60.85, 47.29, 34.16, 30.09, 14.12; **HRMS(ESI)**:  $m/z$  calcd for  $C_{41}H_{49}N_2O_5S$  ( $M+NH_4$ )<sup>+</sup>- 681.3357, found 681.3362.

**ethylN-((3-chlorophenyl)(4-hydroxy-3,5-dimethylphenyl)methyl)-N-((4-nitrophenyl)sulfonyl)glycinate (5k):**

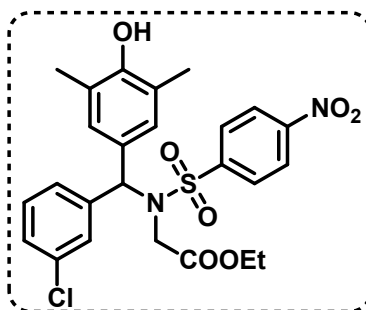

Yellow solid, isolated yield- 71%;  $R_f$  (20% EtOAc/Hexane)- 0.5; **<sup>1</sup>H NMR (400MHz,DMSO- $d_6$ )**:  $\delta$  8.33-8.26 (3H,m), 8.05-8.03 (2H,m), 7.27-7.26 (2H,m), 7.14 (1H,s), 7.09-7.07 (3H,m), 6.45 (1H,s), 6.12 (1H,s), 4.14 (2H,s), 3.83-3.77 (2H, m), 1.97 (6H,s), 0.99-0.96 (3H,m); **<sup>13</sup>C NMR (100MHz,DMSO- $d_6$ )**:  $\delta$  173.76, 158.27, 154.85, 150.41, 146.51, 138.04, 135.16, 134.34, 134.29, 133.30, 132.56, 132.24, 131.97, 129.20, 129.13, 69.30, 65.86, 52.48, 21.72, 18.91; **HRMS(ESI)**:  $m/z$  calcd for  $C_{25}H_{29}ClN_3O_7S$  ( $M+NH_4$ )<sup>+</sup>- 550.1409, found 550.1400.

#### IV. Gram Scale Experiment

To a solution of *p*-QM **1a** (1g, 3.20 mmol) in  $CHCl_3$  (7ml) in a 50 ml round bottom flask, 3.52 milimol of **2e** was added. Then the reaction mixture was then cooled to 0 ° C and  $K_2CO_3$  (19.2 mmol, 6eq) was added and the reaction mixture was stirred for 7 h at rt and monitored by TLC until the starting material could not be detected. The reaction mixture was quenched with water and extracted with DCM (5 mL  $\times$  3). The organic layer was dried over  $Na_2SO_4$  and evaporated in vacuum. The residue was purified by silica gel column chromatography to afford the desired product **3e** (89% yield, 1.4 gm).

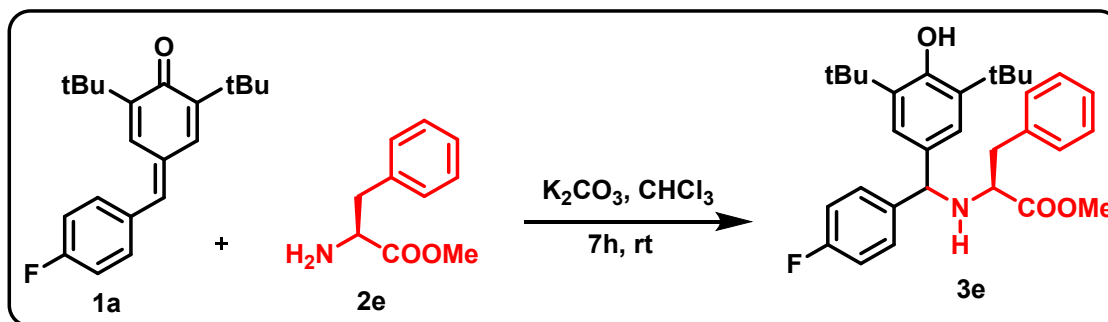

#### V. Some more Examples

Our methodology worked with primary amine as well as secondary amine also.

**2,6-di-tert-butyl-4-(phenyl(phenylamino)methyl)phenol (6):**

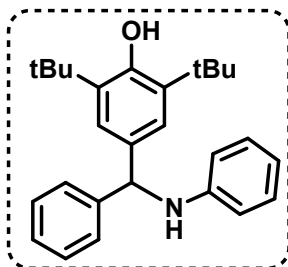

Light yellow solid, isolated yield- 72%;  $R_f$  (10% EtOAC/Hexane)- 0.5;  $^1H$  NMR (400MHz,  $CDCl_3$ ):  $\delta$  7.41-7.39 (2H,m), 7.33-7.29 (2H,m), 7.24-7.20 (1H,m), 7.12-7.08 (2H,m), 7.07 (2H,s), 6.68-6.64 (1H,m), 6.55-6.53 (2H,m), 5.40 (1H,s), 5.15 (1H,s), 4.23 (1H, brs), 1.38 (18H,s);  $^{13}C$  NMR (100MHz,  $CDCl_3$ ):  $\delta$  153.05, 147.68, 143.16, 136.01, 134.12, 129.07, 128.56, 127.14, 126.92, 124.60, 117.35, 113.46, 63.22, 34.41, 30.28; HRMS(ESI): m/z calcd for  $C_{27}H_{34}NO$  (M+H) $^+$ - 388.2635, found 388.2625.

**4-((benzylamino)(2,5-bis(benzyloxy)phenyl)methyl)-2,6-di-tert-butylphenol (7):**

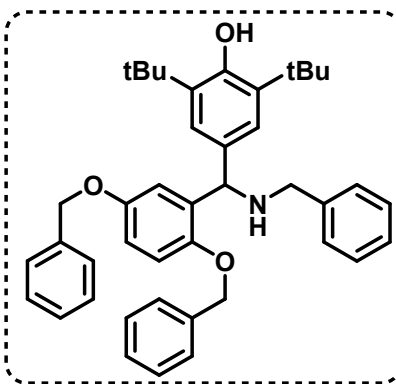

Light yellow solid, isolated yield- 78%;  $R_f$  (10% EtOAC/Hexane)- 0.4;  $^1H$  NMR (400MHz,  $CDCl_3$ ):  $\delta$  7.42-7.41 (2H,m), 7.37-7.28 (13H, m), 7.24-7.22 (3H,m), 6.81-6.74 (2H,m), 5.21 (1H,s), 5.03-5.01 (3H,m), 4.95 (2H,s), 3.73-3.65 (2H,m), 1.35 (18H,s);  $^{13}C$  NMR (100MHz,  $CDCl_3$ ):  $\delta$  153.36, 152.56, 150.59, 140.91, 137.47, 135.41, 134.29, 133.96, 128.56, 128.48, 128.35, 128.26, 127.86, 127.70, 127.54, 127.21, 126.74, 124.37, 114.85, 113.40, 113.08, 70.67, 70.62, 60.10, 52.23, 34.34, 30.37; HRMS(ESI): m/z calcd for  $C_{42}H_{48}NO_3$  (M+H) $^+$ - 614.3629, found 614.3605.

**VI. Synthetic Application**

**Suzuki-Miyaura coupling:** A mixture of **3i** (1equiv), phenylboronic acid (1.4 equiv),  $K_2CO_3$  (2 equiv) and  $Pd(PPh_3)_4$  (7 mol%) in toluene (2 mL) was stirred at 90°C for 12h in  $N_2$  to afford the corresponding product **3j** with 55% yield.

**Kumada coupling:**  $Pd(OAc)_2$  (3 mol%), SPhos (4 mol%) and **3i** (1equiv) were added to an 25ml screw-capped reaction vial equipped with a magnetic stir bar and Teflon septum. The vial was purged by an argon balloon and toluene (1 mL) was added. Another 4 mL screwcapped glass vial equipped with a Teflon septum was purged by an argon balloon, then a slight excess of Grignard reagent in THF (1.3 equiv) was added and diluted in toluene to a final concentration of 0.32 M. PhMgBr solution was added over 1h at 50 °C. The reaction mixture was monitored by TLC until the starting material was consumed. After quenching with aqueous  $NH_4Cl$ , the reaction mixture was extracted with EtOAc and the combined organic layers were filtered through a short plug of silica gel and concentrated under reduced pressure. The crude product was purified by flash chromatography to afford the product **3j** with 50% yield.

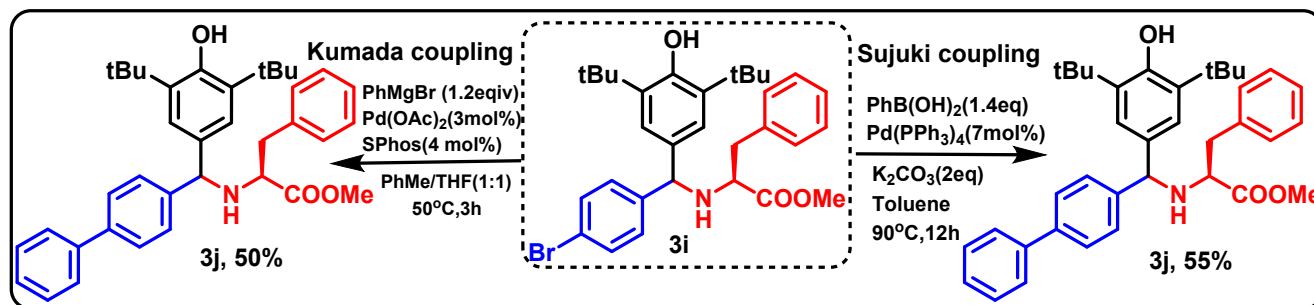

## VII. Photo-physical studies

**Table.** Data related to Absorption and Fluorescence emission for compounds **3a,3d,3e, 3f,3j** and **5g**.

| Comp<br>ound | Absorption $\lambda_{max}$ (nm) |              |          |     |                 | Fluorescence peak positions (nm) |          |          |                       |                            |
|--------------|---------------------------------|--------------|----------|-----|-----------------|----------------------------------|----------|----------|-----------------------|----------------------------|
|              | A<br>C<br>N                     | Et<br>O<br>H | Me<br>OH | THF | Di<br>oxa<br>ne | ACN                              | Et<br>OH | Me<br>OH | THF                   | Dioxane                    |
| <b>3a</b>    | 355                             | 354          | 354      | 355 | 355             | 400;<br>424                      | 42<br>6  | 42<br>4  | 354                   | 348; 361; 372;<br>400; 422 |
| <b>3d</b>    | 354                             | 354          | 360      | 354 | 350             | 389;424                          | 48<br>0  | NF       | 375; 384;<br>398; 425 | 373;381;395;423            |
| <b>3e</b>    | 354                             | 361          | 258      | 354 | 354             | 356                              | 42<br>1  | NF       | 417                   | 349; 372; 492              |



|                     |             |         |         |             |         |                     |    |         |                       |                       |
|---------------------|-------------|---------|---------|-------------|---------|---------------------|----|---------|-----------------------|-----------------------|
| <b>3f</b>           | 3<br>5<br>4 | 35<br>4 | 35<br>4 | 354         | 35<br>4 | 356;<br>400;<br>425 | NF | NF      | 356; 389;<br>401; 425 | 356; 389; 401;<br>425 |
| <b>3j</b>           | 3<br>7<br>5 | 37<br>5 | 37<br>6 | 375         | 37<br>4 | 354;<br>422         | NF | 45<br>2 | 354                   | 377; 397              |
| <b>5g</b>           | 3<br>5<br>7 | 35<br>1 | 35<br>6 | 351;<br>427 | 35<br>1 | 324;<br>375         | NF | 39<br>2 | NF                    | 377; 397              |
| NF : Nonfluorescent |             |         |         |             |         |                     |    |         |                       |                       |

## VIII. References

- 
- 1) Chu, W. D.; Zhang, L.F.; X. H.; Zeng, C.; Du, J.Y.; Zhang, G. B.; Wang, F. X.; Ma, X. Y.; Fan, C. A. *Angew. Chem., Int. Ed.* **2013**, *52*, 9229.
- 2) Muthusamy, S.; Sivaguru, M. *Org. Lett.* **2014**, *16*, 4248-4251.
